# Supplementary material for: Determination and climatology of the diurnal cycle of the atmospheric mixing layer height over Beijing 2013–2018: lidar measurements and implications for air pollution
Source: Copernicus journal article supplement (doi:10.5194/acp-20-8839-2020), 2020-07-27
Supplement: Supplementary file 1 [file acp-20-8839-2020-supplement.pdf]

Supplement of Atmos. Chem. Phys., 20, 8839–8854, 2020  
<https://doi.org/10.5194/acp-20-8839-2020-supplement>  
© Author(s) 2020. This work is distributed under  
the Creative Commons Attribution 4.0 License.

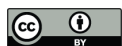

*Supplement of*

**Determination and climatology of the diurnal cycle of the atmospheric mixing layer height over Beijing 2013–2018: lidar measurements and implications for air pollution**

**Haofei Wang et al.**

*Correspondence to:* Zhengqiang Li (lizq@radi.ac.cn)

The copyright of individual parts of the supplement might differ from the CC BY 4.0 License.

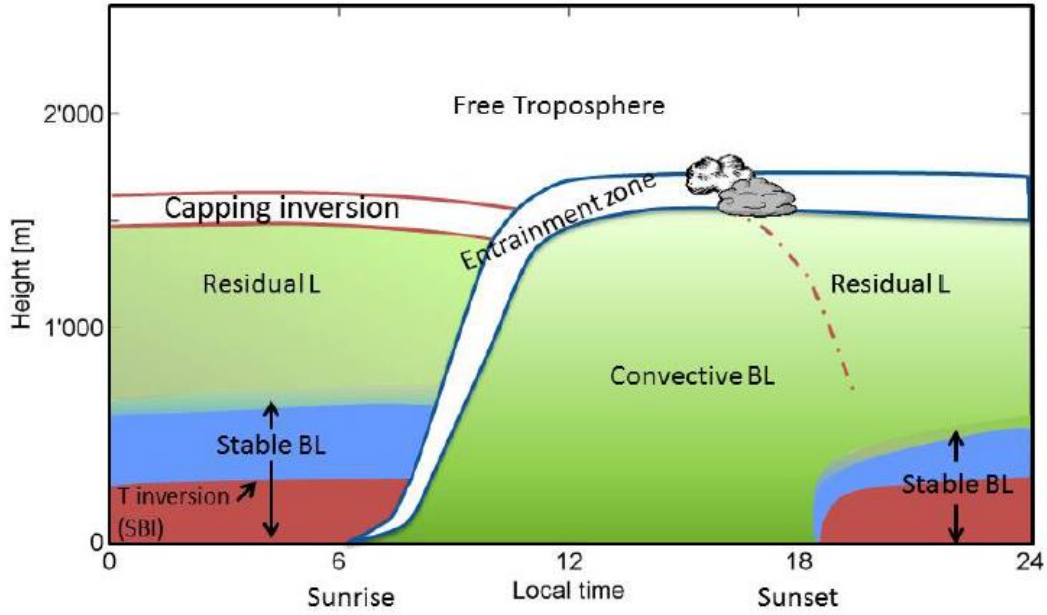

Fig.S1. Diurnal cycle of the PBL height over land for a clear convective day (adapted from Collaud et al., 2014).

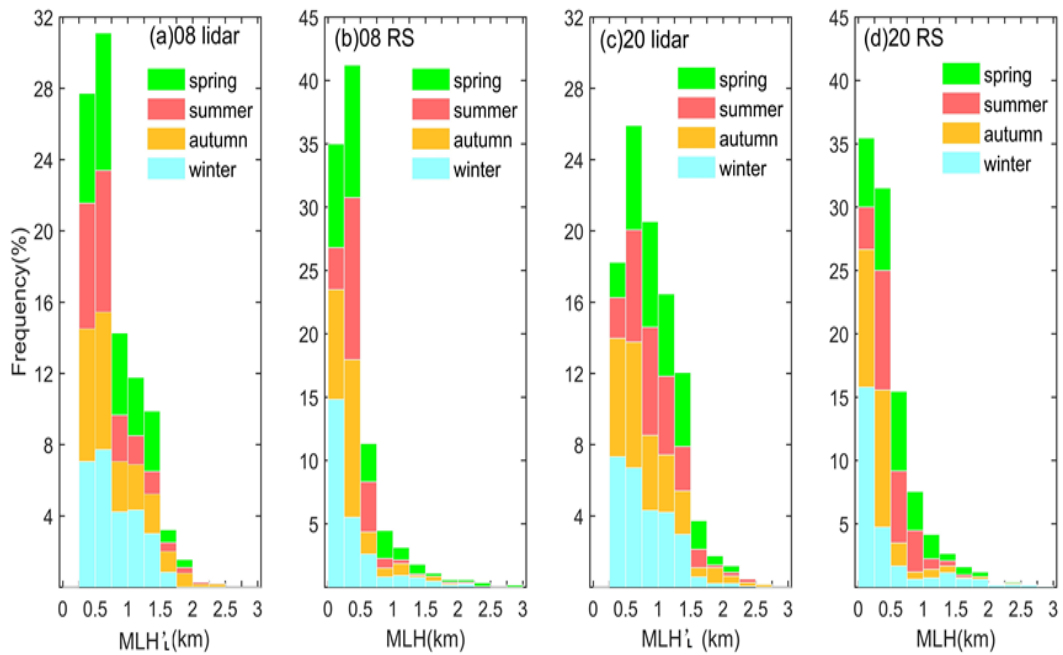

Fig. S2. Comparison of frequency distribution of all  $MLH_L'$  retrieved from lidar and  $MLH_{RS}$  from radiosonde with the supplementary information of seasonal variation (2013-2018).  $MLH$  from (a) lidar and (b) radiosonde at time of 08 (LST), (c) lidar and (d) radiosonde at time of 20 (LST) are presented. Noted that for presenting the detail distribution,  $MLH_L'$  add up to 20%, while  $MLH_{RS}$  add up to 45%.

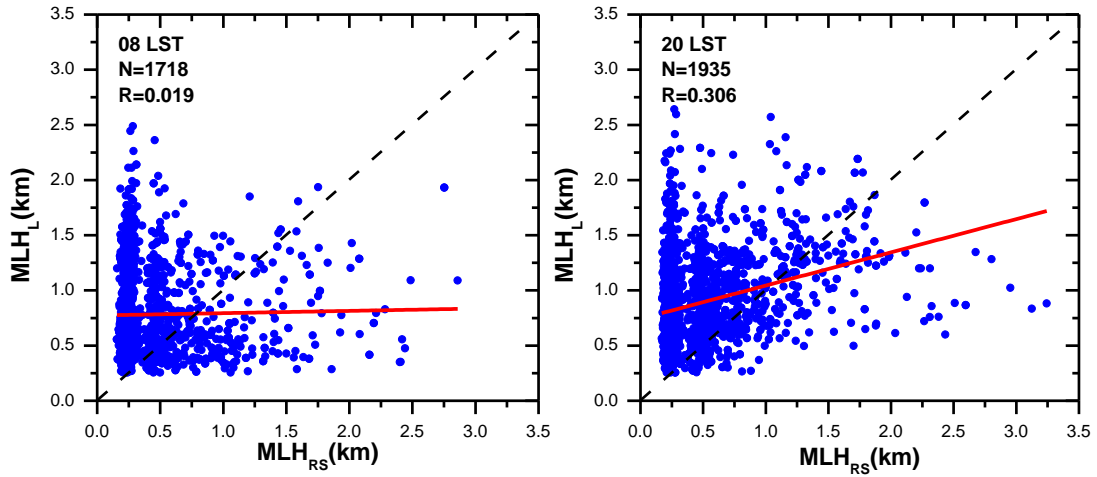

Fig.S3. Comparisons between MLH<sub>L</sub> derived from lidar and MLH<sub>RS</sub> from radiosonde at time of 08 and 20 (LST). Red line indicates the linear fitting, while the black dash line represents the 1:1 line.

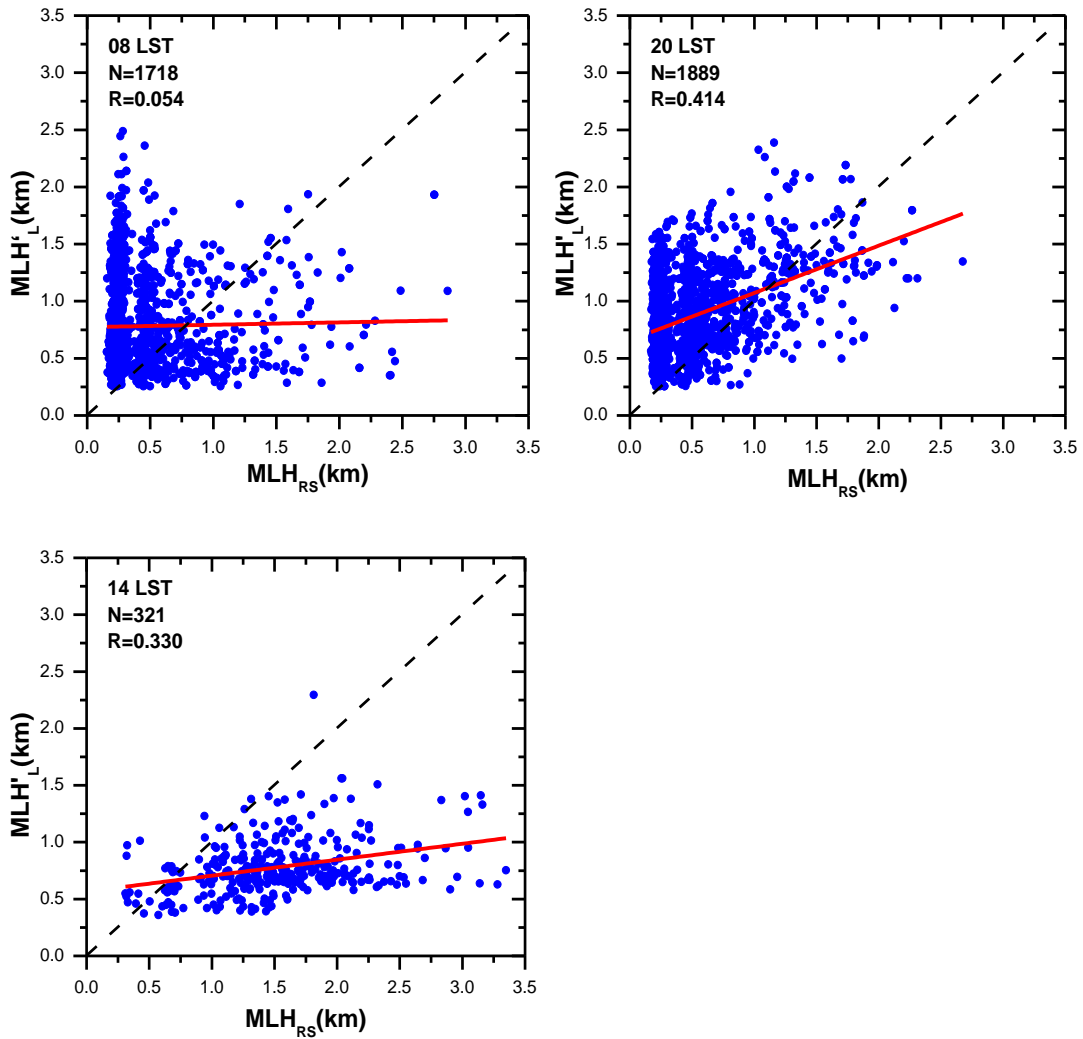

Fig.S4. Comparisons between MLH'<sub>L</sub> derived from lidar and MLH<sub>RS</sub> from radiosonde at time of 08, 14 and 20 (LST). Red line indicates the linear fitting, while the black dash line represents the 1:1 line.

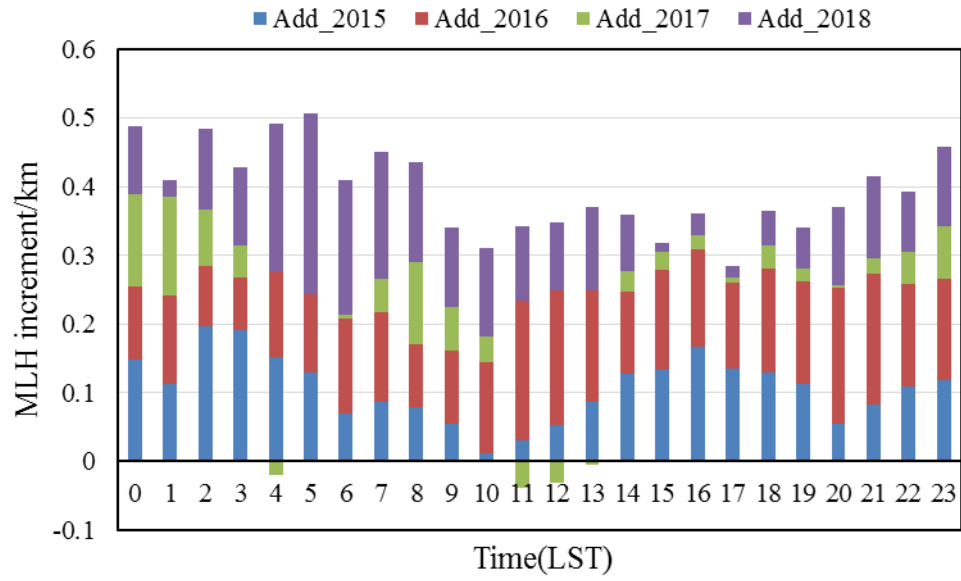

Fig.S5. Inter-annual changes of the increment of MLH<sub>L</sub> obtained by lidar throughout the day.
